# Supplementary material for: Frequency of Circulating Tumor Cells (CTC) in Patients with Brain Metastases: Implications as a Risk Assessment Marker in Oligo-Metastatic Disease
Source: PubMed Central journal article supplement (PMC6315958; doi:10.3390/cancers10120527), 2018-12-19
Supplement: cancers-10-00527-s001.pdf [file cancers-10-00527-s001.pdf]

## Supplementary Materials: Frequency of Circulating Tumor Cells (CTC) in Patients with Brain Metastases: Implications as a Risk Assessment Marker in Oligo-Metastatic Disease

Annkathrin Hanssen, Carlotta Riebensahm, Malte Mohme, Simon A. Joosse, Janna-Lisa Velthaus, Lars Arne Berger, Christian Bernreuther, Markus Glatzel, Sonja Loges, Katrin Lamszus, Manfred Westphal, Sabine Riethdorf, Klaus Pantel and Harriet Wikman

Table S1. Multivariate analysis.

| All cases        | Cut off 2 ≥ CTC | HR     | p-value      | 95% CI       |
|------------------|-----------------|--------|--------------|--------------|
|                  | CellSearch      | 2.711  | <b>0.024</b> | 1.137–6.465  |
|                  | brain           | 3.295  | <b>0.002</b> | 1.530–7.096  |
|                  | adren           | 1.271  | 0.612        | 0.503–3.213  |
|                  | bone            | 1.624  | 0.260        | 0.699–3.776  |
|                  | lung            | 1.033  | 0.925        | 0.527–2.026  |
| All cases        | Cut off 5 ≥ CTC | HR     | p-value      | 95% CI       |
|                  | CellSearch      | 2.846  | <b>0.030</b> | 1.104–7.339  |
|                  | brain           | 3.127  | <b>0.003</b> | 1.476–6.622  |
|                  | adren           | 1.501  | 0.361        | 0.628–3.585  |
|                  | bone            | 1.413  | 0.449        | 0.578–3.451  |
|                  | lung            | 1.120  | 0.738        | 0.576–2.177  |
| Brain Metastases | Cut off 2 ≥ CTC | HR     | p-value      | 95% CI       |
|                  | CellSearch      | 4.694  | <b>0.004</b> | 1.650–13.354 |
|                  | adren           | 5.797  | <b>0.001</b> | 2.018–16.651 |
|                  | bone            | 2.904  | 0.070        | 0.918–9.190  |
|                  | lung            | 0.503  | 0.177        | 0.186–1.365  |
| Brain Metastases | Cut off 5 ≥ CTC | HR     | p-value      | 95% CI       |
|                  | CellSearch      | 4.963  | <b>0.003</b> | 1.752–14.061 |
|                  | adren           | 5.750  | <b>0.001</b> | 1.999–16.540 |
|                  | bone            | 2.848  | 0.076        | 0.896–9.054  |
|                  | lung            | 0.499  | 0.173        | 0.184–1.356  |
| Lung Metastases  | Cut off 2 ≥ CTC | HR     | p-value      | 95% CI       |
|                  | CellSearch      | 4.547  | 0.069        | 0.890–23.220 |
|                  | Adren           | 2.093  | 0.799        | 0.342–12.820 |
|                  | Bone            | 4.650  | 0.181        | 0.489–44.181 |
|                  | Brain           | 2.677  | 0.250        | 0.499–14.362 |
| Lung Metastases  | Cut off 5 ≥ CTC | HR     | p-value      | 95% CI       |
|                  | CellSearch      | 36.790 | <b>0.009</b> | 2.455–551.35 |
|                  | adren           | 4.417  | <b>0.049</b> | 1.004–19.44  |
|                  | bone            | 2.803  | 0.415        | 0.236–33.37  |
|                  | brain           | 2.105  | 0.356        | 0.433–10.24  |

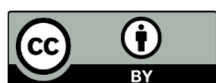

© 2018 by the authors. Licensee MDPI, Basel, Switzerland. This article is an open access article distributed under the terms and conditions of the Creative Commons Attribution (CC BY) license (<http://creativecommons.org/licenses/by/4.0/>).
